# Supplementary material for: Interfacial engineering in amorphous/crystalline heterogeneous nanostructures as a highly effective battery-type electrode for hybrid supercapacitors
Source: Royal Society of Chemistry journal article supplement (doi:10.1039/d2ta00689h), 2022-01-01
Supplement: d2ta00689h1.pdf [file d2ta00689h1.pdf]

## Supporting Information

### **Interfacial engineering in amorphous/ crystalline heterogeneous nanostructures as a highly effective battery-type electrode for hybrid supercapacitors**

Dongyan Gao<sup>a</sup>, Yifan Pan<sup>a</sup>, Jinhe Wei<sup>a</sup>, Dandan Han<sup>a,\*</sup>, Pengcheng Xu<sup>a</sup>, Yen Wei<sup>b,\*</sup>, Liucheng Mao<sup>b</sup>, Xiaohong Yin<sup>c</sup>

<sup>a</sup> *College of Chemistry and Pharmaceutical Engineering, Jilin Institute of Chemical Technology, Jilin 132022, China*

<sup>b</sup> *Department of Chemistry and the Tsinghua Center for Frontier Polymer Research, Tsinghua University, Beijing, 100084, China*

<sup>c</sup> *School of Chemistry and Chemical Engineering, Tianjin University of Technology, Tianjin 300384, China*

\*Corresponding author.

*E-mail address:* handandan@jlicet.edu.cn (D.H.); weiyen@tsinghua.edu.cn (Y.W.)

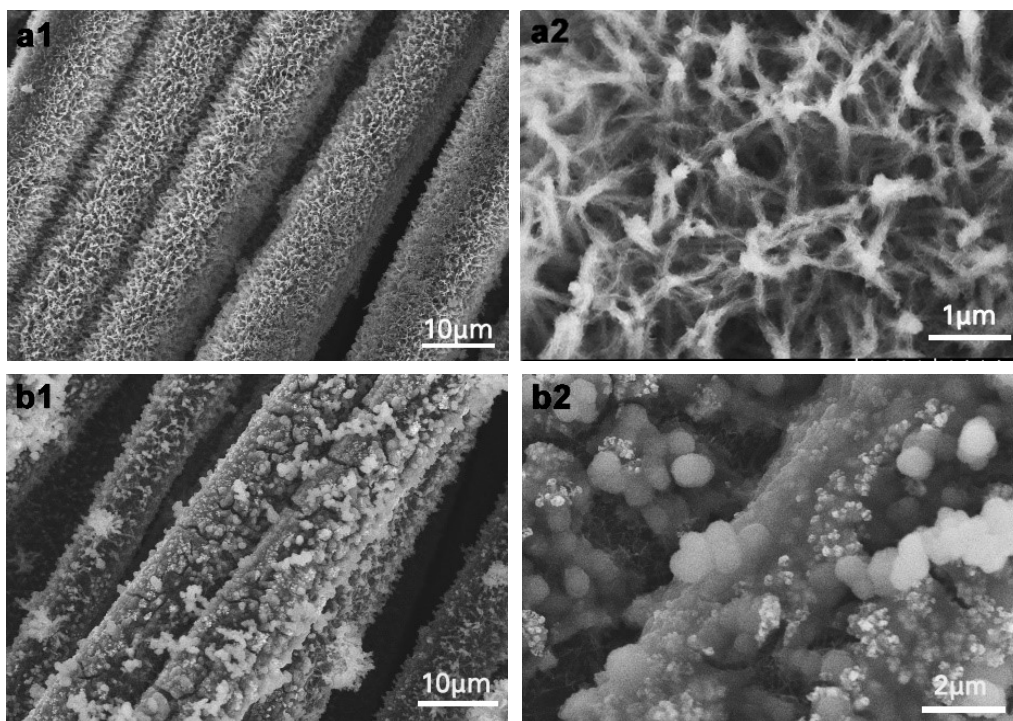

**Figure S1.** (a1, a2) SEM images of CC/NiCo<sub>2</sub>O<sub>4</sub>@NiCo-P-2 and (b1, b2) SEM images of CC/NiCo<sub>2</sub>O<sub>4</sub>@NiCo-P-8.

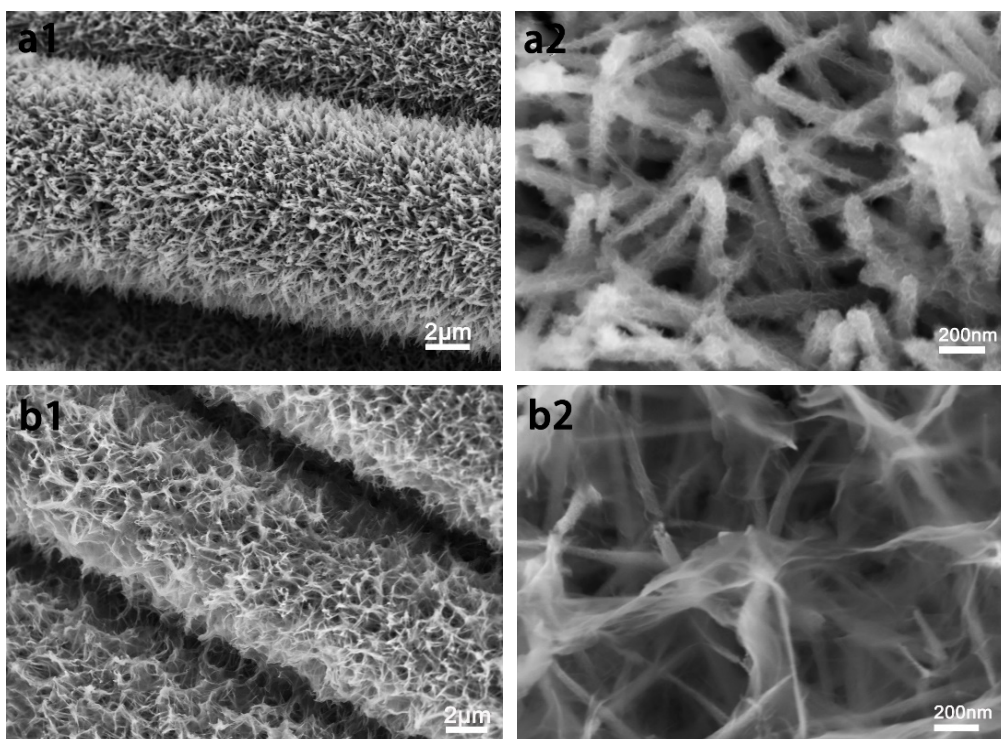

**Figure S2.** (a1, a2) SEM images of CC/NiCo<sub>2</sub>O<sub>4</sub>@Ni-P-5 and (b1, b2) SEM images of CC/NiCo<sub>2</sub>O<sub>4</sub>@Co-P-5.

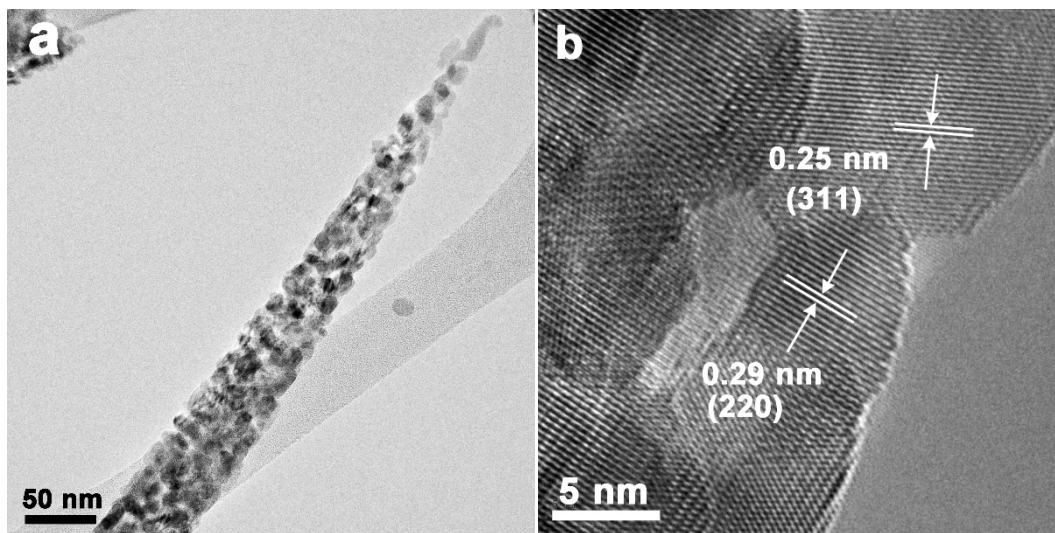

**Figure S3.** TEM images of NiCo<sub>2</sub>O<sub>4</sub> nanowires.

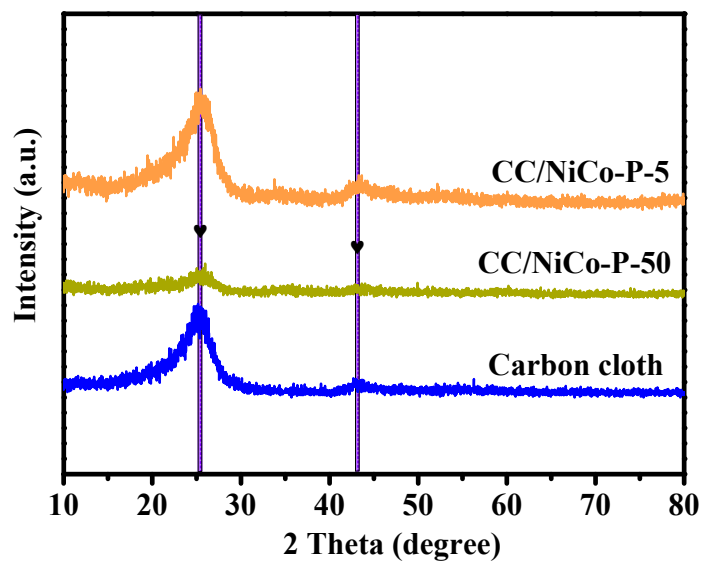

**Figure S4.** XRD patterns of amorphous CC/NiCo-P-5 nanosheets with different deposition time. Obviously, when the deposition time is 5 cycles, there is no diffraction peaks except for the diffraction peaks of carbon cloth. In order to eliminate the influence of the weak signal caused by the amount of the sample, the deposition time was extended to 50 cycles. It can be noted that some weak diffraction peaks are corresponding to carbon cloth, which is attributed to the reason that the amorphous phosphate encapsulates the carbon cloth (the diffraction peak intensity is reduced by this thickened package).

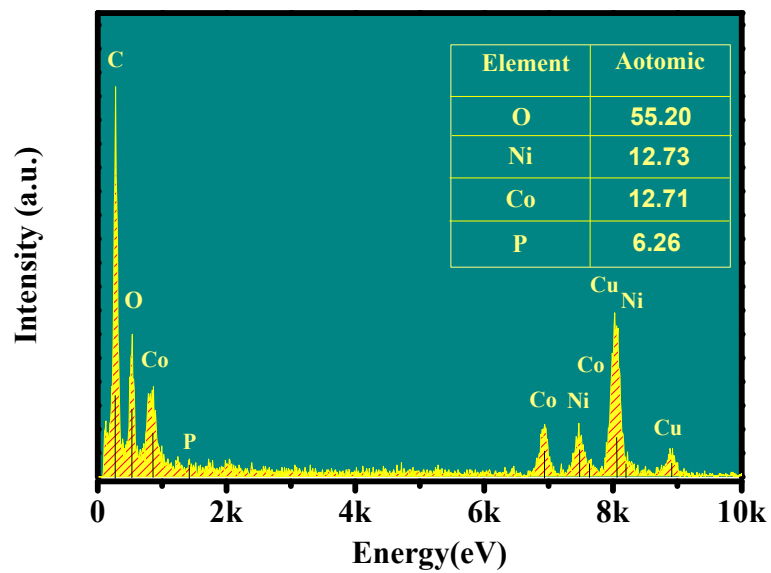

Figure S5. EDX spectrum of CC/NiCo<sub>2</sub>O<sub>4</sub>@NiCo-P-5

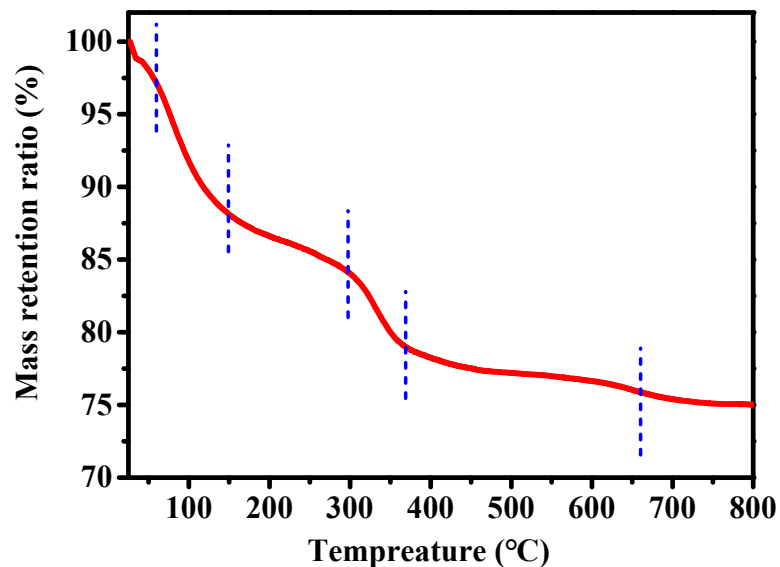

**Figure S6.** TGA analysis curve of the CC/NiCo-P-5 with a rising rate of  $10^{\circ}\text{C}\cdot\text{min}^{-1}$  from 25 to 800  $^{\circ}\text{C}$  at  $\text{N}_2$  atmosphere. A weight loss was about 12% from 25 to 150  $^{\circ}\text{C}$ , owing to the decomposition of physically absorbed water and some residual alcohol on the surface of the sample. A weight loss was about 5.5% from 300 to 370  $^{\circ}\text{C}$ , which attributed to the decomposition of structural water. After 400  $^{\circ}\text{C}$ , the mass remained basically unchanged. Therefore, TGA data, coincident with the results mentioned above (EDX, XPS and so on), further indicate that the molecular formula of amorphous substance can be calculated as  $\text{NiCo}-(\text{HPO}_4)_2\cdot\text{H}_2\text{O}$ .

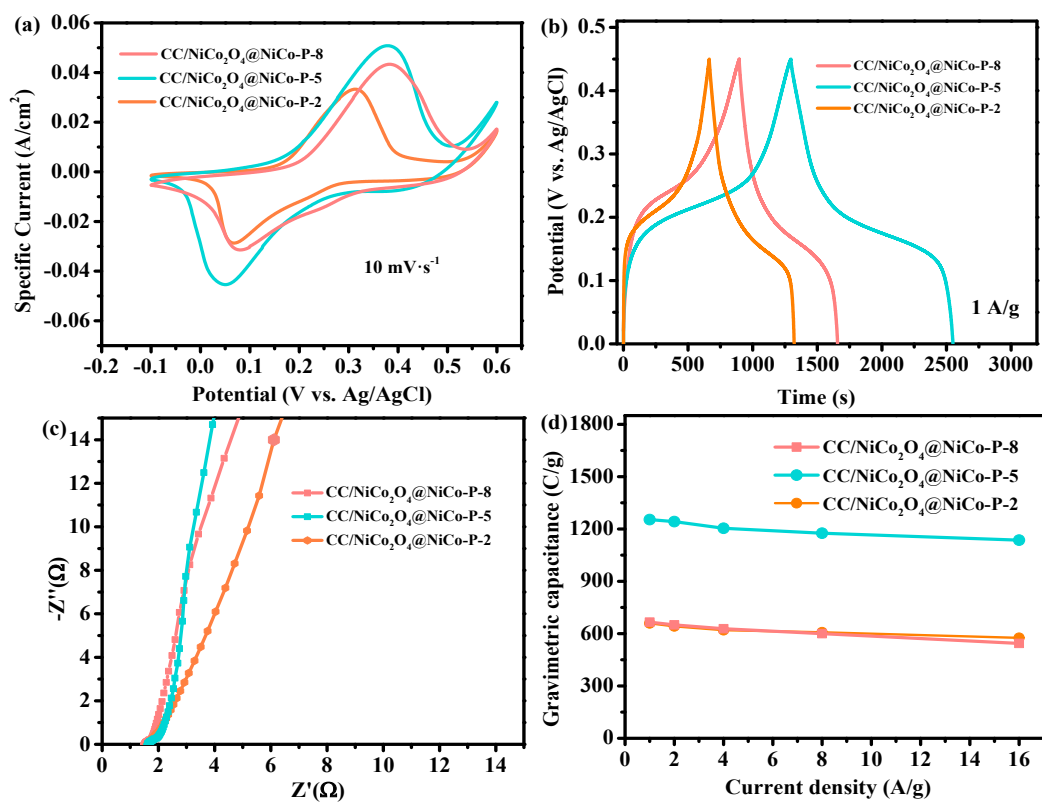

**Figure S7.** Comparison of electrochemical performance between CC/NiCo<sub>2</sub>O<sub>4</sub>@NiCo-P-8, CC/NiCo<sub>2</sub>O<sub>4</sub>@NiCo-P-5 and CC/NiCo<sub>2</sub>O<sub>4</sub>@NiCo-P-2 electrodes: (a) CV curves at 10 mV·s<sup>-1</sup>. (b) GCD curves at 1A·g<sup>-1</sup>; (c) Nyquist plot of the three electrodes; (d) Specific capacity at different specific currents.



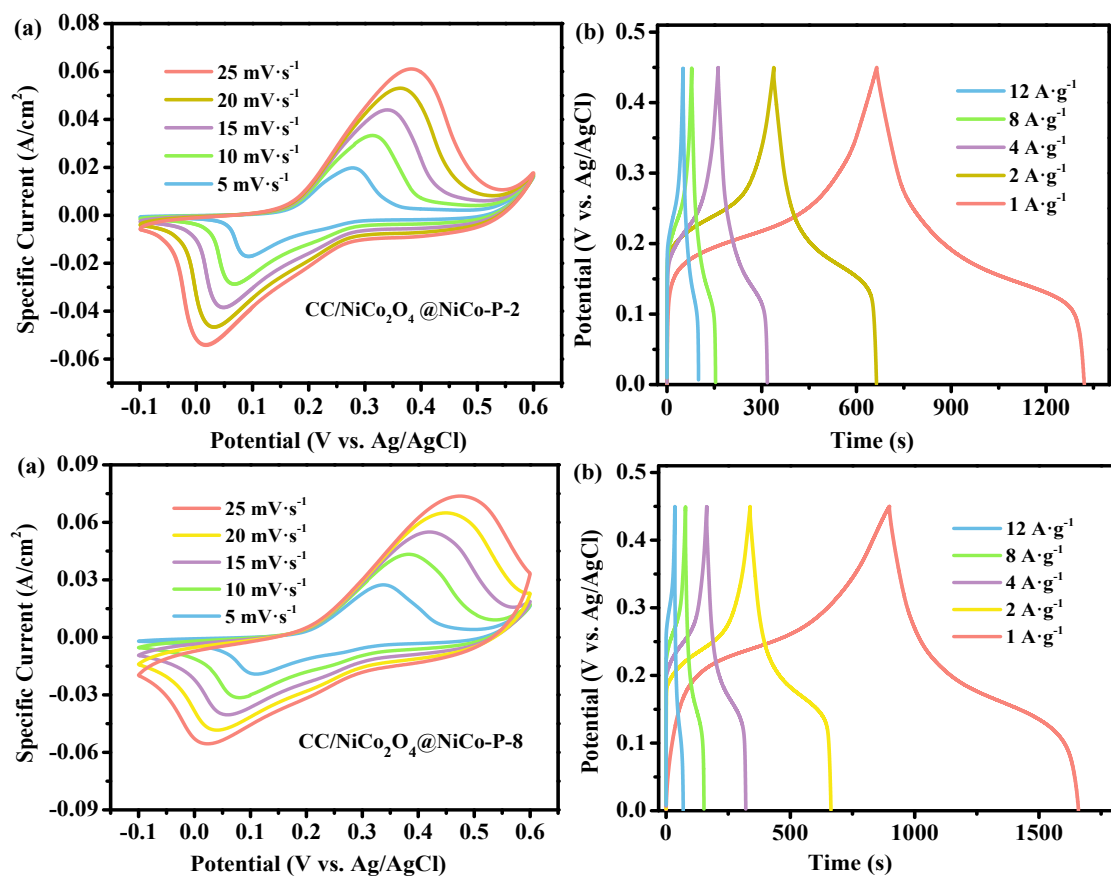

**Figure S8.** (a) CV curves and (b) GCD curves of CC/NiCo<sub>2</sub>O<sub>4</sub>@NiCo-P-2. (a) CV curves and (b) GCD curves of CC/NiCo<sub>2</sub>O<sub>4</sub>@NiCo-P-8.

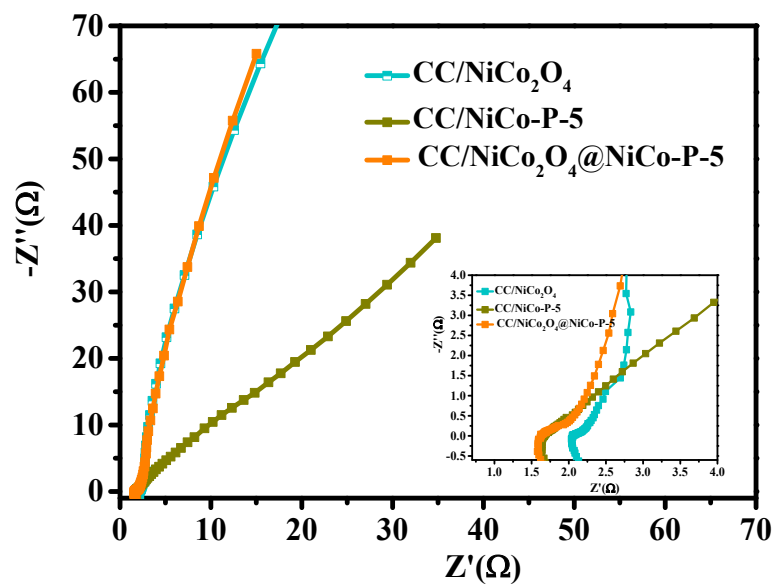

**Figure S9.** Nyquist plot of CC/NiCo<sub>2</sub>O<sub>4</sub>@NiCo-P-5, CC/NiCo-P-5 and CC/NiCo<sub>2</sub>O<sub>4</sub>.

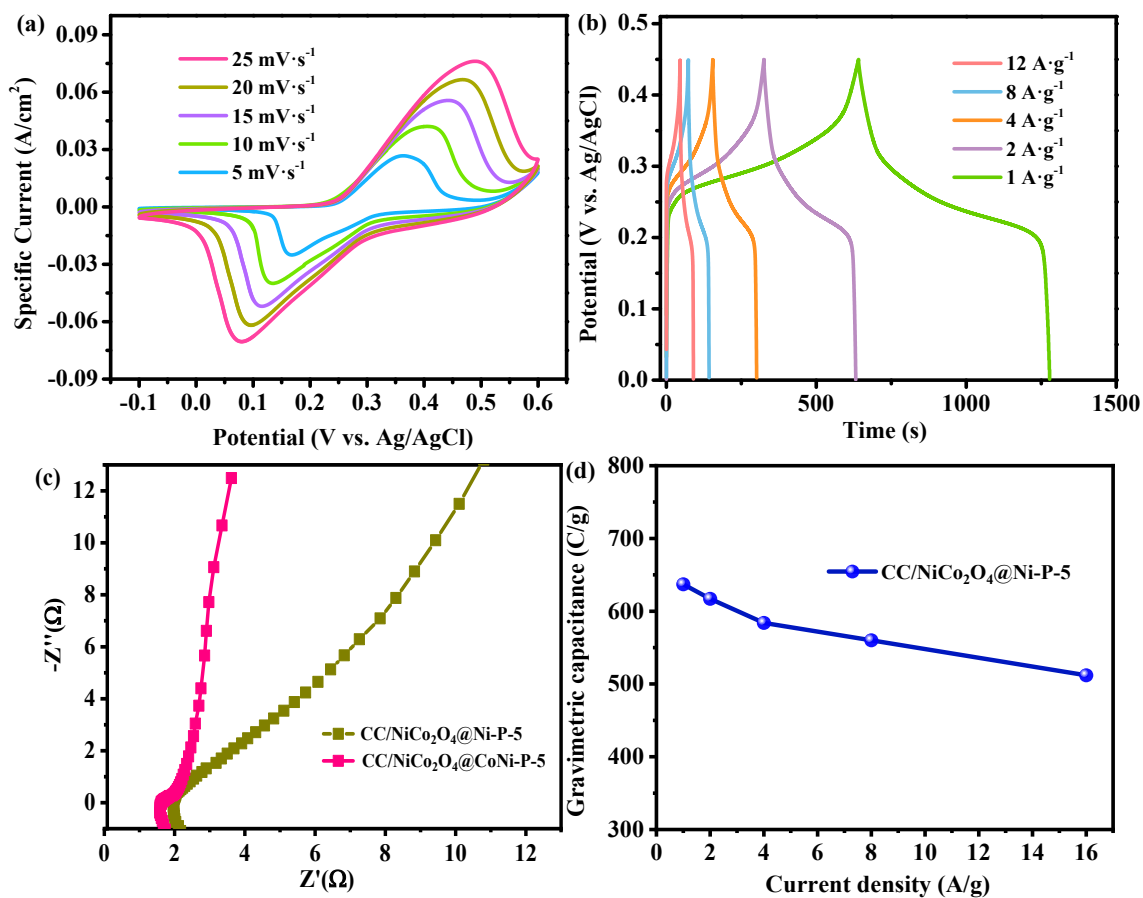

**Figure S10.** (a) CV curves and (b) GCD curves of CC/NiCo<sub>2</sub>O<sub>4</sub>@Ni-P-5. (c) Nyquist plot in the frequency of 10 kHz to 0.01 Hz. (d) specific capacities of CC/NiCo<sub>2</sub>O<sub>4</sub>@Ni-P-5.

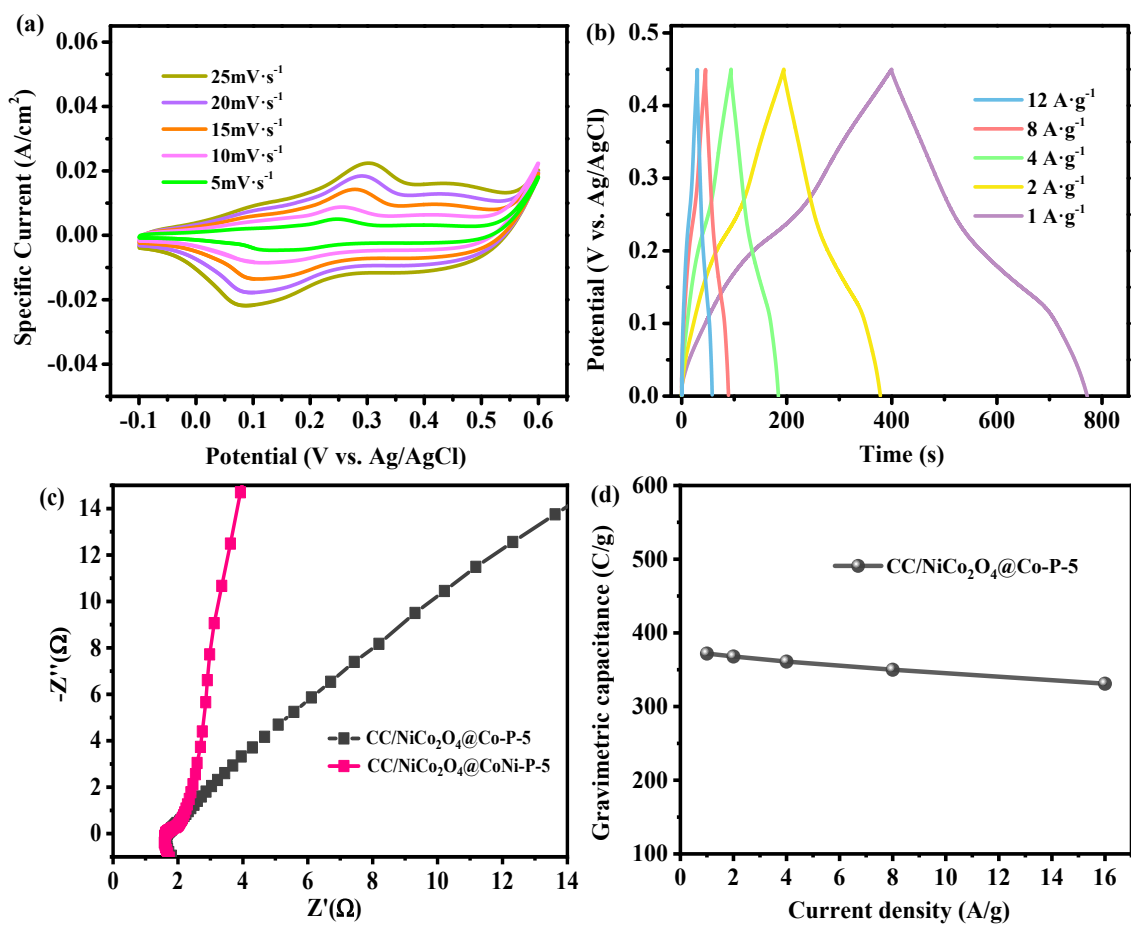

**Figure S11.** (a) CV curves and (b) GCD curves of CC/NiCo<sub>2</sub>O<sub>4</sub>@Co-P-5. (c) Nyquist plot in the frequency of 10 kHz to 0.01 Hz. (d) specific capacities of CC/NiCo<sub>2</sub>O<sub>4</sub>@Co-P-5.

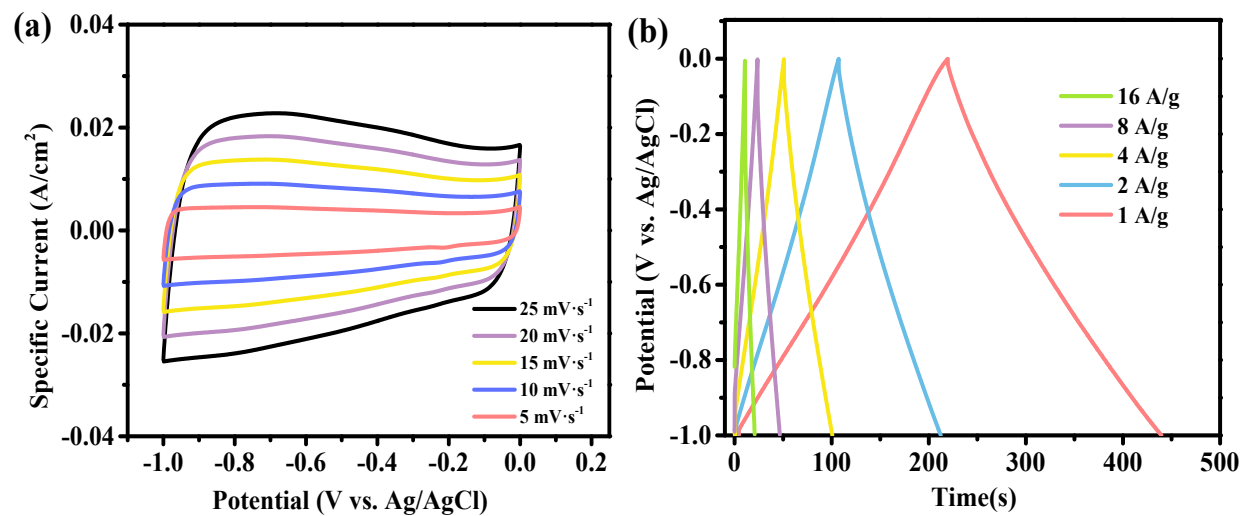

**Figure S12.** (a) CV curves and (b) GCD curves of AC HSC device.

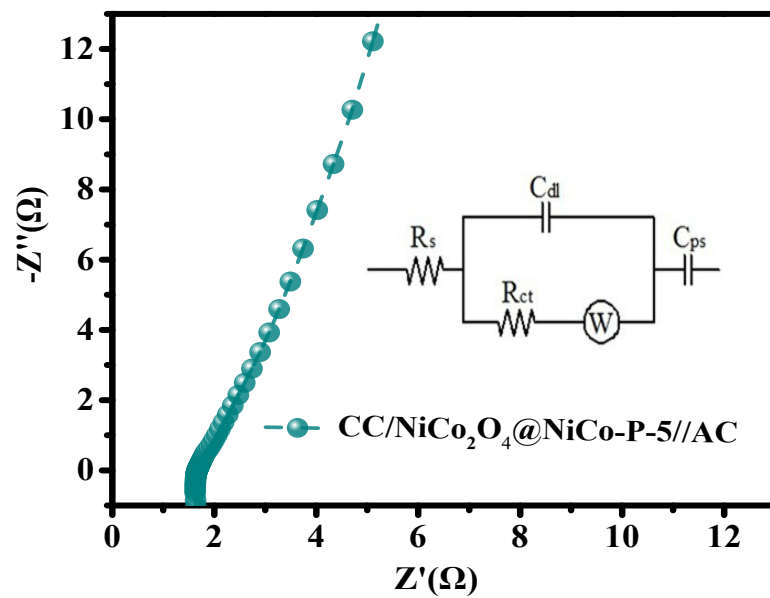

**Figure S13.** Nyquist plots of the CC/NiCo<sub>2</sub>O<sub>4</sub>@NiCo-P-5//AC HSC device; the insets show the high-frequency range and equivalent circuit used to simulate the Nyquist plots.

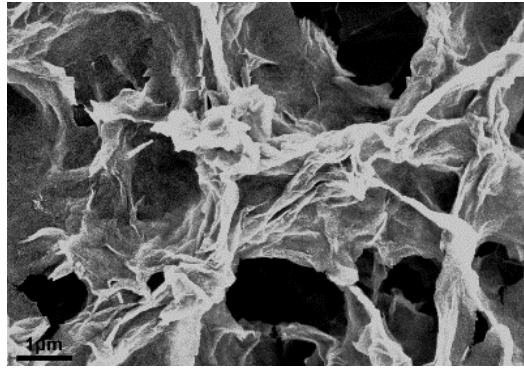

**Figure S14.** SEM images of CC/NiCo<sub>2</sub>O<sub>4</sub>@NiCo-P-5 after cycling

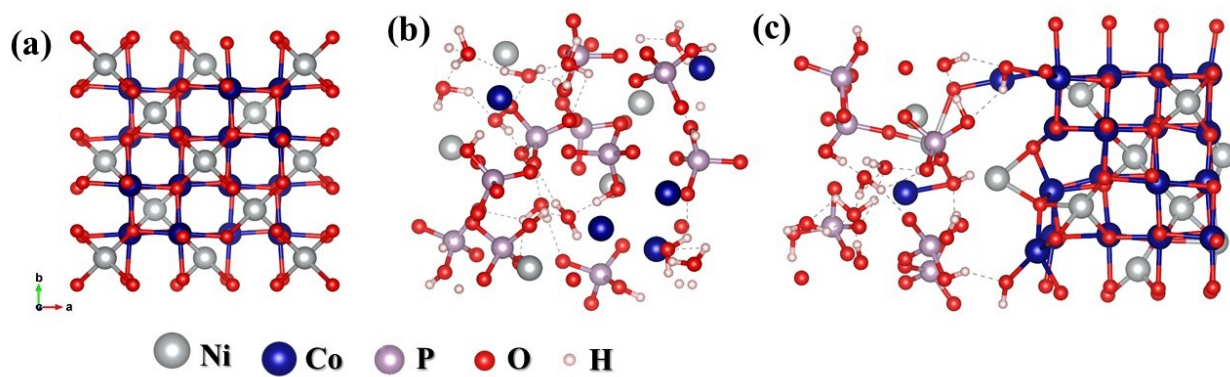

**Figure S15.** Optimized atomic structure models of (a)  $\text{NiCo}_2\text{O}_4$ , (b)  $\text{NiCo-P}$  and (c)  $\text{NiCo}_2\text{O}_4@\text{NiCo-P}$



**Table S1.** Comparison of electrochemical performances of the amorphous electrode material with previous reports.

| Materials                                                         | Electrolyte   | Capacity                        | Reference                                           |
|-------------------------------------------------------------------|---------------|---------------------------------|-----------------------------------------------------|
| amorphous cobalt hydrogen phosphate                               | 2M KOH        | 176.82 C/g (1 A/g)              | J. Power Sources<br>449 (2020) 227487               |
| amorphous Ni-Co double hydroxide                                  | 2M KOH        | 768.15 C/g (1 A/g)              | Nanoscale<br>13 (2021) 8562-8574                    |
| amorphous Co-Ni pyrophosphates                                    | 3M KOH        | 692.45 C/g (1.5 A/g)            | ACS Appl. Mater. Interfaces<br>8 (2016) 23114-23121 |
| amorphous Mn <sub>3</sub> O <sub>4</sub>                          | 1M NaOH       | 298 C/g (1 mA/cm <sup>2</sup> ) | ACS Appl. Mater. Interfaces<br>11 (2019) 39394      |
| Amorphous Vanadium Oxides                                         | 5 M LiCl      | 346 C/g (0.625 A/g)             | Chem. Eng. J.<br>403 (2021) 126380                  |
| amorphous Ni-Co-Fe hydroxide                                      | 4M KOH        | 805 C/g (6.4 A/g)               | Adv. Energy Mater.<br>5 (2015) 1401767              |
| amorphous Co <sub>3</sub> O <sub>4</sub>                          | 1M KOH        | 226.1 C/g (1.3 A/g)             | Chem. Eng. J.<br>396 (2020) 125364                  |
| amorphous nickel borate                                           | 6M KOH        | 496.44 C/g (0.2 mV/s)           | J. Mater. Chem. A.<br>6 (2018) 19689-19695          |
| <b>amorphous NiCo(HPO<sub>4</sub>)<sub>2</sub>·H<sub>2</sub>O</b> | <b>2M KOH</b> | <b>688 C/g (1 A/g)</b>          | <b>This work</b>                                    |

**Table S2.** Comparison of electrochemical performances of the amorphous/crystalline heterostructure electrode material with previous reports.

| Materials                                                                             | Electrolyte   | Capacity                          | Reference                               |
|---------------------------------------------------------------------------------------|---------------|-----------------------------------|-----------------------------------------|
| amorphous MoS <sub>x</sub> @crystalline FeCo <sub>2</sub> O <sub>4</sub>              | 3M KOH        | 978 C/g (1 A/g)                   | Chem. Eng. J. 417 (2021) 127927         |
| crystalline Ag@amorphous nickel-cobalt hydroxide                                      | 6M KOH        | 718.1 C/g (1 A/g)                 | Adv. Mater. Interfaces 6 (2019) 1900858 |
| crystalline Ni <sub>2</sub> P <sub>2</sub> O <sub>7</sub> @amorphous NiCo-OH          | 2M KOH        | 35.36 C/g (3 mA/cm <sup>2</sup> ) | Small 10 (2019) 1901145                 |
| crystalline Ni <sub>3</sub> S <sub>4</sub> @amorphous MoS <sub>2</sub>                | 6M KOH        | 576.36 C/g (2 A/g)                | Small 11 (2015) 3694-3702               |
| crystalline/amorphous Fe <sub>2</sub> O <sub>3-<math>\delta</math></sub>              | 1 M LiOH      | 630.9 C/g (6 A/g)                 | Nano Energy 45 (2018) 390-397           |
| crystalline/amorphous Co <sub>3</sub> S <sub>4</sub>                                  | 2M KOH        | 815.4 C/g (5 mA/cm <sup>2</sup> ) | J. Mater. Chem. A. 6 (2018) 21350-21359 |
| crystalline ZIF-67@amorphous ZIF                                                      | 6M KOH        | 470.7 C/g (1 A/g)                 | J. Mater. Sci. 55 (2020) 16360-16373    |
| amorphous Ni-Co-S@crystalline MnS                                                     | PVA/KOH       | 1093 C/g (1 A/g)                  | Chem. Eng. J. 416 (2021) 129500         |
| <b>NiCo<sub>2</sub>O<sub>4</sub>@NiCo(HPO<sub>4</sub>)<sub>2</sub>·H<sub>2</sub>O</b> | <b>2M KOH</b> | <b>1254 C/g (1 A/g)</b>           | <b>This work</b>                        |
